1

2

3

4 **Predicting potential current distribution of *Lycorma delicatula* (Hemiptera: Fulgoridae)**  
5 **using MaxEnt model in South Korea**

6

7 **Hyeban Namgung<sup>1¶</sup>, Min-Jung Kim<sup>2¶</sup>, Sunghoon Baek<sup>2</sup>, Joon-Ho Lee<sup>2,3\*</sup>, Hyojoong Kim<sup>1\*</sup>**

8

9

10

11 **<sup>1</sup> Department of Biology, Kunsan National University, Gunsan 54150, Republic of Korea**

12

13 **<sup>2</sup> Entomology program, Department of Agricultural Biotechnology, Seoul National**  
14 **University, Seoul 08826, Republic of Korea**

15

16 **<sup>3</sup> Research Institute of Agriculture and Life Sciences, Seoul National University, Seoul**  
17 **08826, Republic of Korea**

18

19 **\*Corresponding author**

20 **E-mail: [jh7lee@snu.ac.kr](mailto:jh7lee@snu.ac.kr) (JL), [hkim@kunsan.ac.kr](mailto:hkim@kunsan.ac.kr) (HK)**

21

22

23 **¶These authors contributed equally to work**

24

## 25 Abstract

26 *Lycorma delicatula* (Hemiptera: Fulgoridae) is invasive insect in Korea which causes  
27 plant damages by sucking and sooty molds. *Lycorma delicatula* was first detected in South  
28 Korea in 2004, where its introduction and spreading possibly were affected by human activity-  
29 related factors. Here, we used MaxEnt to describe current distribution of *L. delicatula* in Korea  
30 and tried to find out the impact of human influences for distribution. We used 143 sites of  
31 occurrence data, 19 bioclimatic variables, duration of temperature below -11°C, average daily  
32 minimum temperature in January, cumulative thermal unit variable, the distribution of grape  
33 orchard variable and human footprint to create models. These models were estimated by two  
34 sets of 24 candidates with feature combinations and regularization multipliers. In addition,  
35 these two sets were created as models with and without footprint for how human influence  
36 affect to distribution. Model selection for optimal model was performed by selecting a model  
37 with a lowest sum of each rank in small sample-size corrected Akaike's information criterion  
38 and difference between training and test AUC. Model of LQ10 parameter combinations was  
39 selected as optimal models for both model sets. Consequently, both of distribution maps from  
40 these models showed similar patterns of presence probability for *L. delicatula*. Both models  
41 expected that low altitude regions were relatively more suitable than mountain areas in Korea.  
42 Footprint might be limited for the distribution and *L. delicatula* might already occupy most of  
43 available habitats. Human-related factors might contribute to spread of *L. delicatula* to  
44 uninfected areas.

45

## 46 Introduction

47 Spotted lanternfly, *Lycorma delicatula* (Hemiptera: Fulgoridae), is an invasive species  
48 of which origin is the southern China and the countries in the subtropical zones of Southeast

49 Asia [1]. In Korea, *L. delicatula* was first detected in Cheonan in 2004 [2], and then expanded  
50 across South Korea for more than a decade [3]. Since its first detection, the agricultural area,  
51 mostly grapevine yards, damaged by *L. delicatula* increased rapidly from one ha in 2006,  
52 seven ha in 2007, 91 ha in 2008, 2,946 ha in 2009, to 8,378 ha in 2010 [4, 5]. According to  
53 Park et al. [3], *L. delicatula* might disperse more frequently in the western region and its long-  
54 distance dispersal could be possible beyond the mountain range. These rapid spread might  
55 be caused by human-related factors such as vehicles which mainly could transfer a host plant  
56 or other material with its egg masses [6].

57 A few studies have been conducted for determining potential habitats and habitat  
58 suitability of *L. delicatula*. Jung et al. [7] estimated the potential habitats of *L. delicatula* in  
59 Korea by using CLIMEX, which is a mechanistic modelling method based on physiological  
60 traits and constraints [7]. The CLIMEX requires the biological parameters related with the  
61 target insects such as optimal temperature, lower developmental threshold, lethal temperature,  
62 optimal humidity and so on [8]. Nevertheless, information on the biological parameters for *L.*  
63 *delicatula* was limited, and thus estimated potential habitats were not exactly matched with  
64 the current distribution of *L. delicatula* in Korea. A correlative method, which relates  
65 occurrence data of a species to environmental data statistically [9], seems to be better than  
66 deterministic methods (e.g., CLIMEX) because biological information for *L. delicatula* is limited  
67 and human related factors cannot be applied to deterministic methods due to difficulty of  
68 parameterization of them. As one of the correlative methods, MaxEnt could be applied to  
69 describe current distribution of *L. delicatula* in Korea because it needs only presence data and  
70 has high predictive accuracy [10, 11], although a few issues with MaxEnt modeling should be  
71 considered to increase prediction accuracy (e.g., sampling bias of occurrence data, types of  
72 feature, model complexity, criteria of model selection, model evaluation method and etc.)  
73 [12-15].

74 This study aims to select best combinations of parameters for application of presence  
75 data of *L. delicatula* and its surrounding environmental and human related variables in MaxEnt,

76 to select variables affecting the current distribution, to find out the effects of anthropogenic  
77 factor, and to visualize current presence probability of *L. delicatula* in Korea.

78

## 79 **Material and methods**

### 80 **Collection and preparation of presence data of *L. delicatula***

81 Total 143 presence data points of *L. delicatula* were collected from the published  
82 papers [6, 16-19] (15 points), the report of National Institute of Ecology (NIE) [20] (83 points),  
83 and observation of this study (45 points). For developing distribution maps of *L. delicatula*,  
84 data were divided into two data sets; one for training data for model calibration, and the other  
85 for test data for model validation or evaluation [9]. For training data, 83 data points of the NIE  
86 report were selected because these data were collected for whole Korean territories with a  
87 consistent sampling criteria during one year, in 2015. The other 60 points were used for test  
88 data. Both training and test data sets were analyzed to determine spatial patterns using  
89 ArcGIS 10.1 [21] with the average nearest neighbor test, and all data were used in model  
90 development because both data show a random distribution. Data with random distribution  
91 are needed to avoid overestimating problem, which is caused by clustered occurrence data,  
92 in species distribution models [22]

93

### 94 **Environmental variables related to *L. delicatula***

95 Monthly temperature and precipitation data from 1981 to 2010 (30 years) were  
96 downloaded from the web site of the Korea Meteorological Administration (KMA). These  
97 weather data were collected from 73 meteorological stations operated nationwide by KMA,  
98 and then were interpolated by Inverse Distance Weighting (IDW) method for estimating  
99 temperature and precipitation with a grid size of 1 km. Nineteen bioclimatic variables [23] were

100 created in DIVA-GIS 7.5 [24] using these data. These 19 variables were transformed to ASCII  
 101 file format using SDMs tool [25] in ArcGIS 10.1.

102 To consider all variables related with occurrence of *L. delicatula*, published papers on  
 103 its ecology were reviewed (Table 1). Among them, two overwintering related variables,  
 104 development related variable and main host (i.e., grape) distribution of *L. delicatula*, were used  
 105 as these variables expected to be directly related with occurrence of *L. delicatula* in Korea.  
 106 There were multiple studies [6, 26-28] that overwintering egg mortality of *L. delicatula* was  
 107 affected by number of days with minimum temperature below -11°C and average daily  
 108 minimum temperature in January. Thus, these variables (i.e., under\_-11\_Jan and  
 109 min\_tmp\_jan) were created with the same climatic data and interpolation method, and then  
 110 used for 19 bioclimatic variables. Cumulative thermal unit variable (i.e., Degree day) for  
 111 development of *L. delicatula* in locations of 73 meteorological stations of KMA was calculated  
 112 and mapped by using average daily maximum and minimum temperatures of 30 years (1981-  
 113 2010) and 11.13°C lower development threshold from Park's paper [6]. Even although *L.*  
 114 *delicatula* has diverse host plants [16], its adults showed high preference and fitness at grapes  
 115 [16, 29]. Thus, distribution of grape orchard variable (i.e., Grape) was created from 1,916  
 116 dimensions of viticulture by regions ([www.agrix.go.kr](http://www.agrix.go.kr)) with ordinary krigging method in ArcGIS  
 117 10.1.

118 **Table 1. Biological information of *L. delicatula* in published papers.**

| Biological parameters            | stage | Matched information               | Reference   |
|----------------------------------|-------|-----------------------------------|-------------|
| Lower development threshold (°C) | Egg   | 8.14                              | [30]        |
|                                  | Egg   | 11.13                             | [6]         |
| Upper development threshold (°C) | Egg   | 31-33                             | [6]         |
| Low lethal temperature (°C)      | Egg   | - 12.72                           | [28]        |
|                                  | Egg   | - 16.51                           | [6]         |
| Thermal requirements (DD)        | Egg   | 355.4                             | [30]        |
|                                  | Egg   | 293.26                            | [6]         |
| Hatching rate (factors)          | Egg   | Mean daily min temperature in Jan | [28]<br>[6] |

|                                                                                              |            |                                                                                                                                                                                                                                                                                                          |            |
|----------------------------------------------------------------------------------------------|------------|----------------------------------------------------------------------------------------------------------------------------------------------------------------------------------------------------------------------------------------------------------------------------------------------------------|------------|
|                                                                                              | Egg        | Number of days below -11°C<br>in Jan                                                                                                                                                                                                                                                                     | [26]       |
| <b>Peak time of occurrence in <i>A. altissima</i> (DD)<br/>: base temperature (11.13 °C)</b> | 1st        | 270.71 ± 3.38                                                                                                                                                                                                                                                                                            | [6]        |
|                                                                                              | 2nd        | 491.98 ± 7.15                                                                                                                                                                                                                                                                                            |            |
|                                                                                              | 3rd        | 619.31 ± 6.15                                                                                                                                                                                                                                                                                            |            |
|                                                                                              | 4th        | 907.60 ± 9.72                                                                                                                                                                                                                                                                                            |            |
|                                                                                              | Adult      | 1820.65 ± 14.21                                                                                                                                                                                                                                                                                          |            |
| <b>Host plants in Korea (ea)</b>                                                             | All stages | 41 (38 trees and 3 herb plants)                                                                                                                                                                                                                                                                          | [16]       |
| <b>Host preference (plant species)</b>                                                       | Adult      | <i>Juglans mandshurica</i> ,<br><i>Cedrela fissilis</i> , <i>Toona sinensis</i> , <i>Evodia danielii</i> ,<br><i>Phellodendron amurense</i> ,<br><i>Picrasma quassioides</i> ,<br><i>Ailanthus altissima</i> ,<br><i>Parthenocissus quinquefolia</i> ,<br><i>Vitis amurensis</i> , <i>Vitis vinifera</i> | [16], [29] |
| <b>Hatching rate by different light conditions (8; 12; 16h)</b>                              | Egg        | Not significant                                                                                                                                                                                                                                                                                          | [31]       |
| <b>Cyclic behavior</b>                                                                       | Adult      | Sex based dispersal                                                                                                                                                                                                                                                                                      | [6]        |
|                                                                                              | Adult      | Host preference cycle                                                                                                                                                                                                                                                                                    | [32]       |
| <b>preference of color (sticky trap)</b>                                                     | All stages | Brown                                                                                                                                                                                                                                                                                                    | [30]       |
| <b>Inhibition of growth of grape</b>                                                         | 4th        | Significant                                                                                                                                                                                                                                                                                              | [31]       |
| <b>Parasitism rate of egg parasitoid in origin (%)</b>                                       | Egg        | 30                                                                                                                                                                                                                                                                                                       | [33]       |
| <b>Sex ratio (%)</b>                                                                         | Adult      | 35-45                                                                                                                                                                                                                                                                                                    | [6]        |
| <b>No. eggs in egg mass (ea)</b>                                                             | Egg        | 32.7 ± 6.49                                                                                                                                                                                                                                                                                              | [31]       |
|                                                                                              | Egg        | 40-50                                                                                                                                                                                                                                                                                                    | [16]       |

119

120 Human foot print variable (i.e., footprint) [34] was also downloaded  
 121 (<http://sedac.ciesin.columbia.edu/>) because distribution of *L. delicatula* might be affected by  
 122 human activities [6].

123 Total 24 environmental variables (i.e., 19 bioclimatic variables, under\_-11\_Jan,  
 124 min\_tmp\_jan, Degree day, Grape and footprint) were created to develop distribution model of  
 125 *L. delicatula* In Korea.

126

## 127 **Selection of environmental variables**

128 Multi-collinearity test was conducted to eliminate correlated variables by Pearson's  
129 coefficient ' $r$ ' [35]. If multiple variables were correlated ( $|r| > 0.8$ ), only one variable was  
130 selected based on biological relevance with *L. delicatula* ecology. From this process, 11  
131 variables (bio03, bio05, bio11, bio12, bio13, bio15, bio17, under\_-11\_Jan, Degree day, grape  
132 and footprint) were selected among 24 variables.

133

## 134 **Modelling procedure**

135 As a default setting, MaxEnt offers six features (i.e., an expanded set of  
136 transformations of the original covariates [36] types, L (linear), Q (quadratic), P (product), T  
137 (threshold), H (hinge), C (categorical), which are automatically selected by 'Auto features'  
138 depending on the sample size of training data [37]. In addition, MaxEnt creates a distribution  
139 model, using regularization multiplier (default value = 1), which mitigates model complexity or  
140 overfitting, to make general interpretation [36]. Nevertheless, MaxEnt does not always create  
141 the best model by a given default parameter setting [38]. Therefore, to select the best model  
142 we adjusted the parameters setting and developed 24 candidate models with different feature  
143 combinations and regularization multipliers by using four feature combinations (LQ, LQP, LQH,  
144 LQPH) and six regularization parameters (1, 2, 5, 10, 15, 20). For comparison, another set of  
145 24 models trained by 10 variables except for footprint was also created with previously noted  
146 feature combinations and regularization parameters to estimate habitat suitability excluded  
147 possibility of propagation.

148 For selecting optimal parameter combination, small sample-size corrected Akaike's  
149 information criterion (i.e.,  $AIC_c$ ) [39] and area under the receiver operation characteristic curve  
150 (i.e., AUC) were used to compare candidate models. Because high training AUC (AUC  
151 calculated by training data) might be result of overfitting model, difference between training

152 and test AUC (AUC calculated by test data) were choose for model selection criteria.  
153 Therefore,  $AIC_c$  and difference between training and test AUC ( $AUC_{diff}$ ) were calculated in  
154 ENMTools [40] and MaxEnt. To consider both  $AUC_{diff}$  and  $AIC_c$  [12] for model selection, sum  
155 of each rank in  $AUC_{diff}$  and  $AIC_c$  from the lowest value was used because smaller values of  
156  $AIC_c$  and  $AUC_{diff}$  represent a better model. If sum of rank of candidate models is equal, a model  
157 with a smaller  $AIC_c$  score was selected. From these processes, optimal models were re-built  
158 and importance of each variables evaluated with jackknife test and 10-fold cross-validation.  
159 Each of two models were built with its own selected variables to describe current occurrence  
160 probability of *L. delicatula* in Korea. The maps of two models were visualized in ArcGIS 10.1.

161

## 162 **Results**

### 163 **Selection of best parameter combinations in both models** 164 **for MaxEnt application**

165 LQ10 (i.e., combination of feature types L and Q and regularization multiplier 10),  
166 LQH10 (i.e., combination of feature types L, Q, and H and regularization multiplier 10), and  
167 LQPH5 (i.e., combination of feature types L, Q, P, and H and regularization multiplier 5) were  
168 selected by having the lowest value of summing both ranks in  $AUC_{diff}$  and  $AIC_c$  for the model  
169 without footprint (Fig 1. (A)). However, both LQ10 and LQH10 had same  $AIC_c$  values, and  
170 these values of both parameter combinations were lower than one of LQPH5. Thus, LQ10 and  
171 LQH10 were considered as the best models without footprint for *L. delicatula*. LQ10 and  
172 LQH10 were also determined in the model with footprint (Fig 1. (B)). In both model selections,  
173 LQ10 and LQH10 created exactly same model. Therefore, LQ10 parameter combinations of  
174 each model was selected to build the distribution model for *L. delicatula*.

175



176 **Fig 1. Sum of AUC<sub>diff</sub> and AIC<sub>c</sub> ranks for 24 candidate models.**

177 Sum of AUC<sub>diff</sub> and AIC<sub>c</sub> ranks of all candidate models (A) without footprint and (B) with  
178 footprint. Each AUC<sub>diff</sub> and AIC<sub>c</sub> were ranked in order of ascending power from values  
179 calculated in MaxEnt and ENMTools. Black and grey bar represent rank of AUC<sub>diff</sub> and AIC<sub>c</sub>  
180 respectively. Asterisk (\*) represents final selected models.

181

182 **Evaluation of developed models**

183 Two MaxEnt executions (without footprint and with footprint) with LQ10 parameter  
184 combination created models using five variables in each run (Table 2). The average AUC  
185 score calculated by 10-fold cross-validation with training data and 10 variables for the model  
186 without footprint was  $0.733 \pm 0.064$  (Table 2), indicating reasonable performance (AUC score  
187  $> 0.7$ ; Peterson et al., 2011). When this model was evaluated with test data, the AUC score  
188 was 0.747, representing reliable performance. Among five variables used in modelling, Bio 05  
189 and Degree day were estimated as important variables in distribution model for *L. delicatula*  
190 by occupying more than 90% contributions to determine the distribution model. This result was  
191 also obtained in jackknife test (Fig 2. (A) and Table 3).

192 **Fig 2. Results of Jackknife test for relative importance of used variables in each final**  
193 **model.**

194 Relative importance of (A) ten variables used in model without footprint and (B) 11 variables  
195 used in model with footprint. Jackknife tests were executed with 10-fold cross-validation,  
196 results were averaged values of each run.

197

198 **Table 2. Summary of description and performance of each two models.**

| Model | Model description | Model performance |
|-------|-------------------|-------------------|
|-------|-------------------|-------------------|

| (LQ 10)                  | No. input variables | Used variables                                       | No. parameters | Training AUC | Average AUC (mean±SD) | Test AUC |
|--------------------------|---------------------|------------------------------------------------------|----------------|--------------|-----------------------|----------|
| <b>Without footprint</b> | 11                  | Bio 05<br>Bio 13<br>Bio 15<br>Degree day<br>Grape    | 5              | 0.755        | 0.733 ± 0.064         | 0.747    |
| <b>With footprint</b>    | 10                  | Bio 05<br>Bio 13<br>Degree day<br>Footprint<br>Grape | 5              | 0.789        | 0.769 ± 0.045         | 0.773    |

199 Training AUC and test AUC were calculated by training and test data of occurrence information  
 200 respectively. Average AUC was averaged AUC value of 10 test bins in result of 10-folds cross-  
 201 validation.

202

203 **Table 3. Averaged percent contribution and permutation importance of environmental**  
 204 **variables for each two models.**

| Variables         | Without footprint    |                        | With footprint       |                        |
|-------------------|----------------------|------------------------|----------------------|------------------------|
|                   | Percent contribution | Permutation importance | Percent contribution | Permutation importance |
| <b>Footprint</b>  | -                    | -                      | 51.4                 | 27                     |
| <b>Bio 05</b>     | 91.3                 | 75.2                   | 40.8                 | 53.3                   |
| <b>Bio 15</b>     | 4                    | 1.9                    | -                    | -                      |
| <b>Degree day</b> | 2                    | 16.5                   | 2.4                  | 15.4                   |
| <b>Grape</b>      | 1.7                  | 2.8                    | 1.3                  | 2.9                    |
| <b>Bio 13</b>     | 1                    | 3.3                    | 0.1                  | 1                      |

205

206 The model with footprint performed better than the model without footprint, showing  
 207 that the average AUC score was 0.769 ± 0.045 and test AUC score was 0.773 (Table 2). This  
 208 model was also created with five parameters from five variables regularized by LQ 10  
 209 combination. The footprint and Bio 05 were important variables predicting distribution of *L.*

210 *delicatula* (Fig 2 and Table 3). The response curve of footprint and Degree day showed that  
211 probability of presence was increased linearly (Fig 3. (A) and (C)). Probability of presence was  
212 exponentially increased according to the increase of Bio 05 (Fig 3. (B)).

213

214 **Fig 3. Probability of presence of *L. delicatula* according to each environmental variable.**

215 (A) Human foot print; (B) Max temperature of warmest month; (C) Cumulative thermal unit  
216 (base temperature: 11.13°C); (D) Precipitation seasonality (coefficient of variation); (E)  
217 Distribution of grape orchard; (F) Precipitation of wettest month

218

219 **Current presence probability maps of *L. delicatula* in Korea**

220 Both distribution maps including and excluding footprint variable well described  
221 current presence possibility of *L. delicatula* in Korea, showing similar patterns of presence  
222 probability (Fig 4). Both models expected that mountain areas were potentially unsuitable,  
223 whereas low altitude regions were relatively suitable in Korea (Fig 4). However, the model with  
224 footprint more specifically estimated regions of higher probability of presence rather than that  
225 without footprint (Fig 4).

226

227 **Fig 4. Potential distribution map of *L. delicatula* estimated by two models in Korea.**

228 Probability of presence (MaxEnt's logistic output) predicted by (A) model with footprint and (B)  
229 without footprint.

230

231 **Discussion**

232 Both models without and with footprint predicted well current presence possibility of  
233 *L. delicatula* in Korea. Moreover, there was a strong correlation ( $r = 0.916$ ) between two  
234 models. This indicates that the effects of human-related factors might be limited for the current  
235 distribution of *L. delicatula*, which might already occupy most of available habitats in Korea.  
236 However, the model with footprint showed higher prediction ability than that without footprint  
237 by considering AUC values. From our results, we speculate that human-related factors might  
238 contribute to spread of *L. delicatula* to uninfected areas rather than directly affection for habitat  
239 suitability. Spear et al. [42] found strong relationship between human population density and  
240 richness of alien species, proposing human density as good predictor determining population  
241 size of alien species. This human-mediated propagule pressure could assist successful  
242 establishment of invasive species by supplying population above Allee threshold into new  
243 areas [43]. As for *L. delicatula*, contribution of human factors for its dispersal could be  
244 significant because its eggs were frequently found in packing, construction and agricultural  
245 materials [6, 31]. Recently, *L. delicatula* was also found in Berks county of Pennsylvania, USA  
246 [44, 45]. This introduction and spreading were also suspected by causing human-related  
247 factors such as packing materials and vehicles [44, 45]. Moreover, there was no record of *L.*  
248 *delicatula* found in the DMZ (Demilitarized Zone) area [46, 47] even though physical distance  
249 was not far away from the observed areas. Therefore, human influence could be an important  
250 factor in determining distribution of *L. delicatula*, especially in the early stage of invasion.

251 In both models with and without footprint, Bio 05 (i.e., maximum temperature during  
252 the warmest month) was the most important environmental factor to contribute the distribution  
253 of *L. delicatula*. This might be related to the origin of *L. delicatula* which is South China and  
254 Southeast Asia [48]. Because *L. delicatula* is poikilothermic, its development is increased as  
255 temperature increases up to its upper developmental threshold [49-51]. The mean maximum  
256 temperature during the warmest month in Korea was generally lower than the upper  
257 developmental threshold of *L. delicatula* [6, 52].

258 Degree day, another environmental factor made in this study, also contributes in  
259 distribution modeling of *L. delicatula*. In response curve of Degree day variable, 50% presence  
260 possibility of *L. delicatula* was determined around 1,900 DD similar to the accumulated degree-  
261 days (i.e., 1,821) of peak occurrence of *L. delicatula* adults in fields [6]. One-tailed binomial  
262 tests [53] were applied to training and test data using 1,821 DD, the Degree day variable well  
263 distinguished presence and pseudo-absence of *L. delicatula* significantly ( $p < 0.05$ ) in both  
264 training and test data. Therefore, degree-days would be suitable variable to predict potential  
265 habitat of *L. delicatula*.

266 The other variables (i.e., Bio 13, Bio 15, and grape) used in modeling contribute a  
267 small amount and discrimination ability of these variables for presence or absence of *L.*  
268 *delicatula* was very low. The five variables related to winter temperature (Bio 06, Bio 09, Bio  
269 10, under\_-11\_Jan, and min\_tmp\_jan), which are supposed to determine the hatching rate of  
270 *L. delicatula*, were not selected for the distribution model of *L. delicatula*. Although these  
271 variables were proposed as important variable determining annual population size in many  
272 papers [6, 26-28], they did not explain distribution of *L. delicatula* in this study. This suggests  
273 that low lethal temperature (i.e., around -12.7 °C to -16.5 °C) is over than average winter  
274 temperature in Korea, like Bio 05. As an example, there was no case that January mean  
275 temperature was less than -11 °C in Seoul, one of coldest areas in Korea, during 38 years  
276 (1981-2018), and quite high as  $-2.56 \pm 1.951$  °C (mean  $\pm$  SD) than lower lethal temperature.

277 Both models in this study are closer to realized niche than fundamental one because  
278 these models were not built by deterministic method finding physiological traits of *L. delicatula*,  
279 but had correlative method with distribution and environmental variables [9]. These two models  
280 are strictly realized niche only in Korea, which include environmental variables in Korea and  
281 their unknown interaction [54]. Thus, extrapolation to other regions or predict of future  
282 distribution needs cautions. However, it could be still applicable to predict risk analysis for *L.*  
283 *delicatula* even in non-contaminated areas and countries having high risk of being invaded.

284 In conclusion, major variables related with occurrence of *L. delicatula* in Korea should  
285 be helpful for predicting its occurrence. Moreover, footprint variable might be applicable for  
286 making surveillance plan and deciding domestic quarantine stations in countries with early  
287 stages of invasion of *L. delicatula*, while remaining relevant variables with the occurrence of  
288 *L. delicatula* could be used for risk assessment in non-invaded countries

289

290

## 291 **Acknowledgements**

292 This work was carried out with the support of “Cooperative Research Program for  
293 Agriculture Science & Technology Development (Project No. PJ01257203)” Rural  
294 Development Administration, Republic of Korea. And this work was supported by Korea  
295 Environment Industry & Technology Institute (KEITI) through Exotic Invasive Species  
296 Management Program, funded by Korea Ministry of Environment (MOE) (2018002270005).

297

298

299

## 300 **References**

- 301 1. Xiao G. Forest Insect of China. . Forest Research Institute: Forest Research Institute;  
302 1991. 1361 p.
- 303 2. Kim SS, Kim TW. *Lycorma delicatula* (White) (Hemiptera: Fulgoridae) in Korea. *Lucanus*.  
304 2005;5:9-10.
- 305 3. Park M, Kim K-S, Lee J-H. Genetic structure of *Lycorma delicatula* (Hemiptera: Fulgoridae)  
306 populations in Korea: Implication for invasion processes in heterogeneous landscapes.  
307 *Bull Entomol Res*. 2013;103:1-11. doi: 10.1017/S0007485313000011.
- 308 4. Lee SG. The grape orchards increase geometrically damage areas every year by  
309 *Lycorma delicatula* 2010. 27-9 p.
- 310 5. Lee GY, Kim SG, Kim IH, Kim GS. Seasonal occurrence of spot clothing wax cicada,

- 311 *Lycorma delicatula* (Hemiptera: Fulgoridae) and its control efficacy using EFAM at the  
312 vineyards. Korean J Pestic Sci. 2011;15(3):303-9.
- 313 6. Park M. Overwintering ecology and population genetics of *Lycorma delicatula* (Hemiptera:  
314 Fulgoridae) in Korea: Seoul national university graduate; 2015.
- 315 7. Jung JM, Jung SH, Byeon DH, Lee WH. Model-based prediction of potential distribution  
316 of the invasive insect pest, spotted lanternfly *Lycorma delicatula* (Hemiptera: Fulgoridae),  
317 by using CLIMEX. J Asia Pac Biodivers. 2017. doi: doi.org/10.1016/j.japb.2017.07.001.
- 318 8. Sutherst R, Maywald G, Kriticos D. CLIMEX® software version 3, User's Guide: CSIRO,  
319 Hearne Scientific Software Pty Ltd.; 2007.
- 320 9. Elith J, H. Graham C, P. Anderson R, Dudík M, Ferrier S, Guisan A, et al. Novel methods  
321 improve prediction of species' distributions from occurrence data. Ecography.  
322 2006;29(2):129-51. doi: doi.org/10.1111/j.2006.0906-7590.04596.x.
- 323 10. Phillips SJ, Anderson RP, Schapire RE. Maximum entropy modeling of species  
324 geographic distributions. Ecol Modell. 2006;190(3):231-59. doi:  
325 <https://doi.org/10.1016/j.ecolmodel.2005.03.026>.
- 326 11. Ortega-Huerta AM, Peterson AT. Modeling ecological niches and predicting geographic  
327 distributions: A test of six presence-only methods. Rev Mex Biodivers. 2008;79:205-16.
- 328 12. Warren DL, Seifert SN. Ecological niche modeling in Maxent: the importance of model  
329 complexity and the performance of model selection criteria. Ecol Appl. 2011;21(2):335-  
330 42. doi: doi.org/10.1890/10-1171.1.
- 331 13. Merow C, Smith MJ, Silander JA. A practical guide to MaxEnt for modeling species'  
332 distributions: What it does, and why inputs and settings matter. Ecography.  
333 2013;36(10):1058-69. doi: doi.org/10.1111/j.1600-0587.2013.07872.x.
- 334 14. Kramer-Schadt S, Niedballa J, Pilgrim JD, Schröder B, Lindenborn J, Reinfelder V, et al.  
335 The importance of correcting for sampling bias in MaxEnt species distribution models.  
336 Divers Distrib. 2013;19(11):1366-79.
- 337 15. Radosavljevic A, Anderson RP. Making better Maxent models of species distributions:  
338 complexity, overfitting and evaluation. J Biogeogr. 2014;41(4):629-43. doi:  
339 doi.org/10.1111/jbi.12227
- 340 16. Park JD, Lee SG, Shin SC, Kim JH, Park IG. Biological Characteristics of *Lycorma*  
341 *delicatula* and the Control Effects of Some Insecticides. Korean J Appl Entomol.  
342 2009;48(1):53-7.
- 343 17. Kim SG, Lee KY, Shin YH, Kim GH. Chemical Control Effect Against Spot Clothing Wax  
344 Cicada, *Lycorma delicatula* (Hemiptera: Fulgoridae) Nymphs and Adults. Korean J Pestic  
345 Sci. 2010;14(4):440-5.
- 346 18. Han JM. Studies on Taxonomy of Korean Fulgoridae (Hemiptera) and Introduction of  
347 *Lycorma delicatula* to Korea: Chungbuk national university; 2010.
- 348 19. Pyo SH. Characterization of the Life Cycle of *Lycorma delicatula* and the Effects of  
349 Organophosphate Treatment on the Cycle Stages of the Insect: Chungbuk national  
350 university; 2011.
- 351 20. Ecology Nlo. Monitoring of Invasive Alien Species Designated by the Wildlife Protection  
352 Act (II). National Institute of Ecology: National Institute of Ecology, 2015.
- 353 21. ESRI. ArcGIS 10.1. ESRI. Redlands, California. USA. 2012.
- 354 22. Boria RA, Olson LE, Goodman SM, Anderson RP. Spatial filtering to reduce sampling  
355 bias can improve the performance of ecological niche models. Ecol Modell. 2014;275:73-  
356 7. doi: dx.doi.org/10.1016/j.ecolmodel.2013.12.012.
- 357 23. Ramirez-Villegas J, Bueno-Cabrera. Working with climate data and niche modeling:  
358 Creation of bioclimatic variables. International Center for Tropical Agriculture (CIAT), Cali,  
359 Colombia: International Center for Tropical Agriculture (CIAT), Cali, Colombia; 2009.
- 360 24. Hijmans RJ, Guarino G, Macathur P. DIVA-GIS. Version 7.5.0. Manual.  
361 <http://www.divagis.org>. 2012.
- 362 25. Brown JL, Bennett JR, French CM. SDMtoolbox 2.0: the next generation Python-based  
363 GIS toolkit for landscape genetic, biogeographic and species distribution model analyses.



- 364 PeerJ. 2017;5:e4095. doi: 10.7717/peerj.4095.
- 365 26. Lee YS, Jang MJ, Kim JY, Kim JR. The Effect of Winter Temperature on the Survival of  
366 Lantern Fly, *Lycorma delicatula* (Hemiptera: Fulgoridae) Eggs. Korean J Appl Entomol.  
367 2014;53(3):311-5.
- 368 27. Jeong T-S, Hwang M-R, Moon Y-G, Lee J-H, Lee N-G, Kwon S-B, et al. Occurrence of  
369 *Lycorma delicatula* according to Temperature Changes of Winter Season in Gangwon  
370 Province. Korean Journal of Soil Zoology. 2015;19(1):52-6.
- 371 28. Lee J-S, Kim I-K, Koh S-H, Cho SJ, Jang S-J, Pyo S-H, et al. Impact of minimum winter  
372 temperature on *Lycorma delicatula* (Hemiptera: Fulgoridae) egg mortality. J Asia-Pacific  
373 entomology. 2011;14(1):123-5. doi: doi.org/10.1016/j.aspen.2010.09.004.
- 374 29. Lee JE, Mun SR, An HG, Cho SR, Yang JG, Yoon CM, et al. Feeding Behavior of *Lycorma*  
375 *delicatula* (Hemiptera: Fulgoridae) and Response on Feeding Stimulants of Some Plants.  
376 Korean J Appl Entomol. 2009;48(4):467-77.
- 377 30. Choi D-S, Kim D-I, Ko S-J, Kang B-R, Park J-D, Kim S-G, et al. Environmentally-friendly  
378 control methods and forecasting the hatching time *Lycorma delicatula* (Hemiptera:  
379 Fulgoridae) in Jeonnam Province. Korean J Appl Entomol. 2012;51(4):371-6. doi:  
380 dx.doi.org/10.5656/KSAE.2012.09.0.022.
- 381 31. Song MK. Damage by *Lycorma delicatula* and chemical control in vineyards: Chungbuk  
382 national university; 2010.
- 383 32. Kim JG, Lee E-H, Seo Y-M, Kim N-Y. Cyclic Behavior of *Lycorma delicatula* (Insecta:  
384 Hemiptera: Fulgoridae) on Host Plants. Journal of Insect Behavior. 2011;24(6):423. doi:  
385 10.1007/s10905-011-9266-8.
- 386 33. Choi M-YYZ-QWX-YTY-LHZ-RKJHBYW. Parasitism Rate of Egg Parasitoid *Anastatus*  
387 *orientalis* (Hymenoptera: Eupelmidae) on *Lycorma delicatula* (Hemiptera: Fulgoridae) in  
388 China. Korean J Appl Entomol. 2014;53(2):135-9.
- 389 34. Gallardo B, Zieritz A, Aldridge DC. The importance of the human footprint in shaping the  
390 global distribution of terrestrial, freshwater and marine invaders. PloS one.  
391 2015;10(5):e0125801.
- 392 35. Dormann CF, Elith J, Bacher S, Buchmann C, Carl G, Carré G, et al. Collinearity: a review  
393 of methods to deal with it and a simulation study evaluating their performance. Ecography.  
394 2013;36(1):27-46. doi: doi.org/10.1111/j.1600-0587.2012.07348.x.
- 395 36. Elith J, Kearney M, Phillips S. The art of modelling range-shifting species. Methods Ecol  
396 Evol. 2010;1(4):330-42. doi: doi.org/10.1111/j.2041-210X.2010.00036.x.
- 397 37. Phillips SJ, Dudik M. Modeling of species distributions with Maxent: new extensions and  
398 a comprehensive evaluation. ECOGRAPHY. 2008;31(2):161-75.
- 399 38. Morales-Castilla I, Davies TJ, Pearse WD, Peres-Neto P. Combining phylogeny and co-  
400 occurrence to improve single species distribution models. Glob Ecol Biogeogr.  
401 2017;26(6):740-52. doi: doi.org/10.1111/geb.12580.
- 402 39. Akaike H. A new look at the statistical model identification. IEEE Trans Automat Contr.  
403 1974;19(6):716-23. doi: doi.org/10.1109/TAC.1974.1100705.
- 404 40. Warren DL, Glor RE, Turelli M. ENMTools: a toolbox for comparative studies of  
405 environmental niche models. Ecography. 2010;33(3):607-11. doi: doi.org/10.1111/j.1600-  
406 0587.2009.06142.x.
- 407 41. Peterson AT, Sober, xf, n J, Pearson RG, Anderson RP, et al. Ecological Niches and  
408 Geographic Distributions (MPB-49): Princeton University Press; 2011.
- 409 42. Spear D, Foxcroft LC, Bezuidenhout H, McGeoch MA. Human population density explains  
410 alien species richness in protected areas. Biological Conservation. 2013;159:137-47. doi:  
411 <https://doi.org/10.1016/j.biocon.2012.11.022>.
- 412 43. Drake JM, Lodge DM. Allee Effects, Propagule Pressure and the Probability of  
413 Establishment: Risk Analysis for Biological Invasions. Biol Invasions 2006;8:365. doi:  
414 doi.org/10.1007/s10530-004-8122-6.
- 415 44. Barringer L, Donovall L, Spichiger S-E, Lynch D, Henry D. The First New World Record  
416 of *Lycorma delicatula* (Insecta: Hemiptera: Fulgoridae). Entomol News. 2015;125:20-3.  
417 doi: doi.org/10.3157/021.125.0105.



- 418 45. Dara SK, Barringer L, Arthurs SP. *Lycorma delicatula* (Hemiptera: Fulgoridae): A New  
419 Invasive Pest in the United States. *J Integr Pest Manag.* 2015;6(1):20. doi:  
420 doi.org/10.1093/jipm/pmv021.
- 421 46. Ahn NH, Jeon MJ, Seo HY, Kim KG, Park SJ, Han SH. National List of Species of Korea  
422 「Insect」 (Insects of North Korea). Incheon: NIBR; 2013.
- 423 47. Ecology Nlo. Biodiversity Synthesis Report of the DMZ area: National Institute of Ecology;  
424 2016.
- 425 48. Han JM, Kim HJ, Lim EJ, Lee SH, Kwon YJ, Cho SW. *Lycorma delicatula* (Hemiptera:  
426 Auchenorrhyncha: Fulgoridae: Aphaeninae) finally, but suddenly arrived in Korea.  
427 *Entomol Res.* 2008;38(4):281-6. doi: doi.org/10.1111/j.1748-5967.2008.00188.x.
- 428 49. Lactin DJ, Holliday NJ, Johnson DL, Craigen R. Improved Rate Model of Temperature-  
429 Dependent Development by Arthropods. *Environ Entomol.* 1995;24(1):68-75. doi:  
430 doi.org/10.1093/ee/24.1.68.
- 431 50. Logan JA, Wollkind DJ, Hoyt SC, Tanigoshi LK. An Analytic Model for Description of  
432 Temperature Dependent Rate Phenomena in Arthropods 1. *Environ Entomol.*  
433 1976;5(6):1133-40. doi: doi.org/10.1093/ee/5.6.1133.
- 434 51. Briere J-F, Pracros P, Le Roux A-Y, Pierre J-S. A Novel Rate Model of Temperature-  
435 Dependent Development for Arthropods. *Environ Entomol.* 1999;28:22-9. doi:  
436 doi.org/10.1093/ee/28.1.22.
- 437 52. Pearman PB, Guisan A, Broennimann O, Randin CF. Niche dynamics in space and time.  
438 *Trends Ecol Evol.* 2008;23(3):149-58. doi: doi.org/10.1016/j.tree.2007.11.005.
- 439 53. Pearson RG. *Species' Distribution Modeling for Conservation Educators and Practitioners:*  
440 *Lessons in Conservation*; 2010.
- 441 54. Kearney M, Porter W. Mechanistic niche modelling: combining physiological and spatial  
442 data to predict species' ranges. *Ecol Lett.* 2009;12(4):334-50. doi: doi.org/10.1111/j.1461-  
443 0248.2008.01277.x.

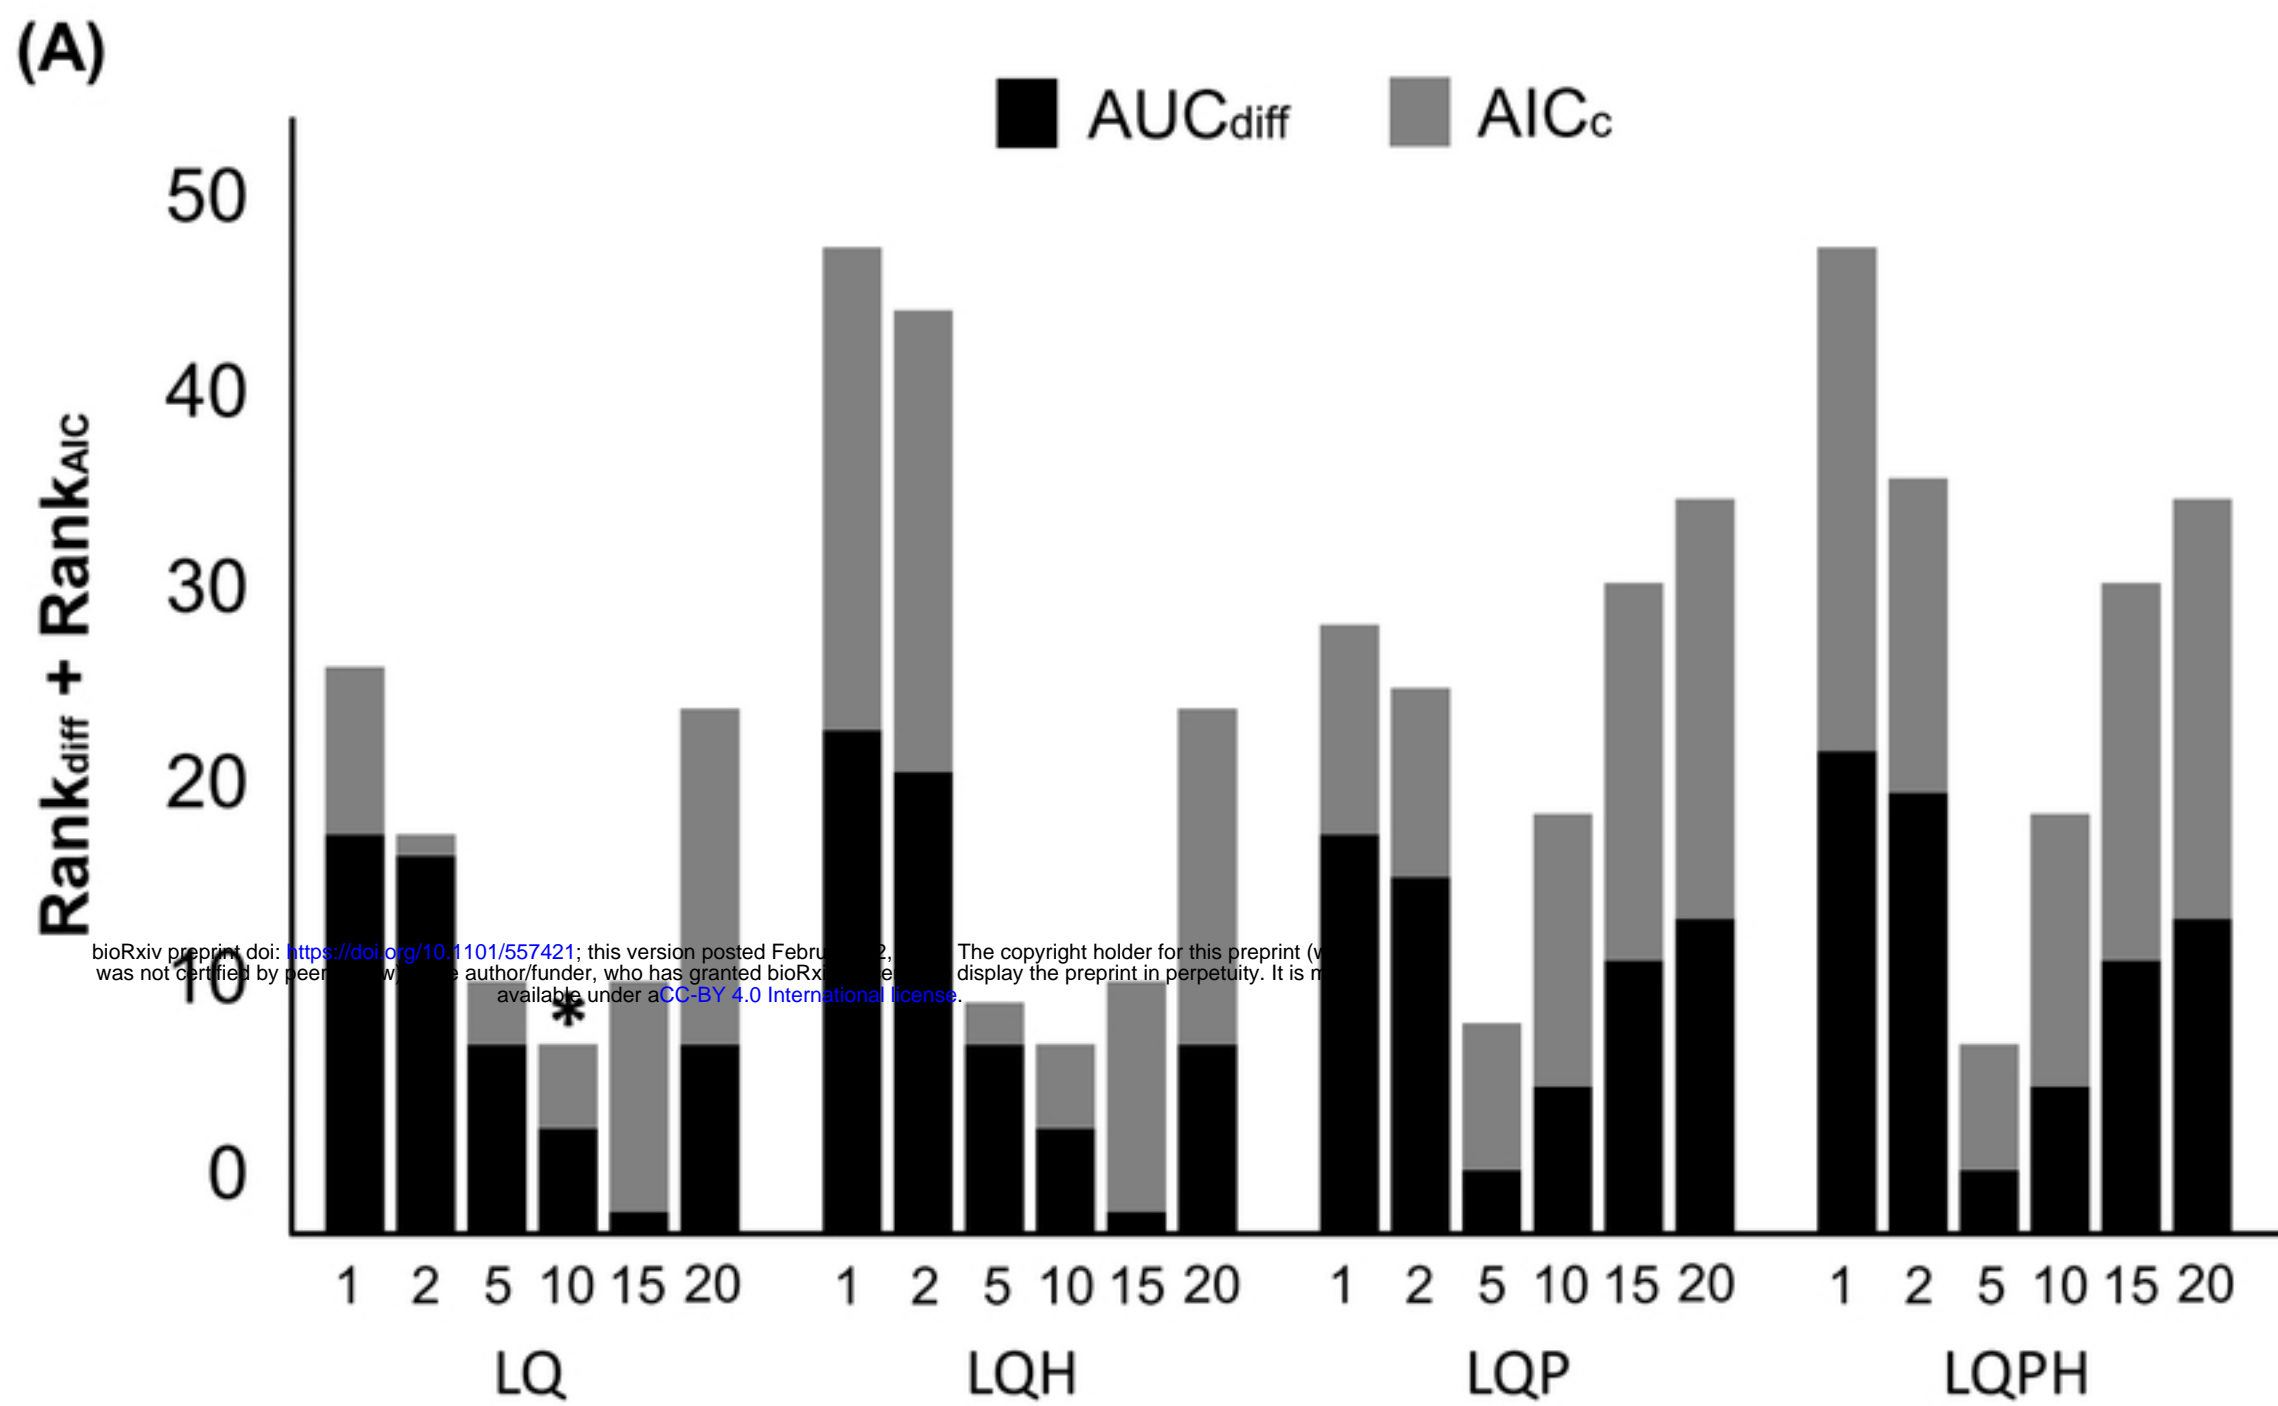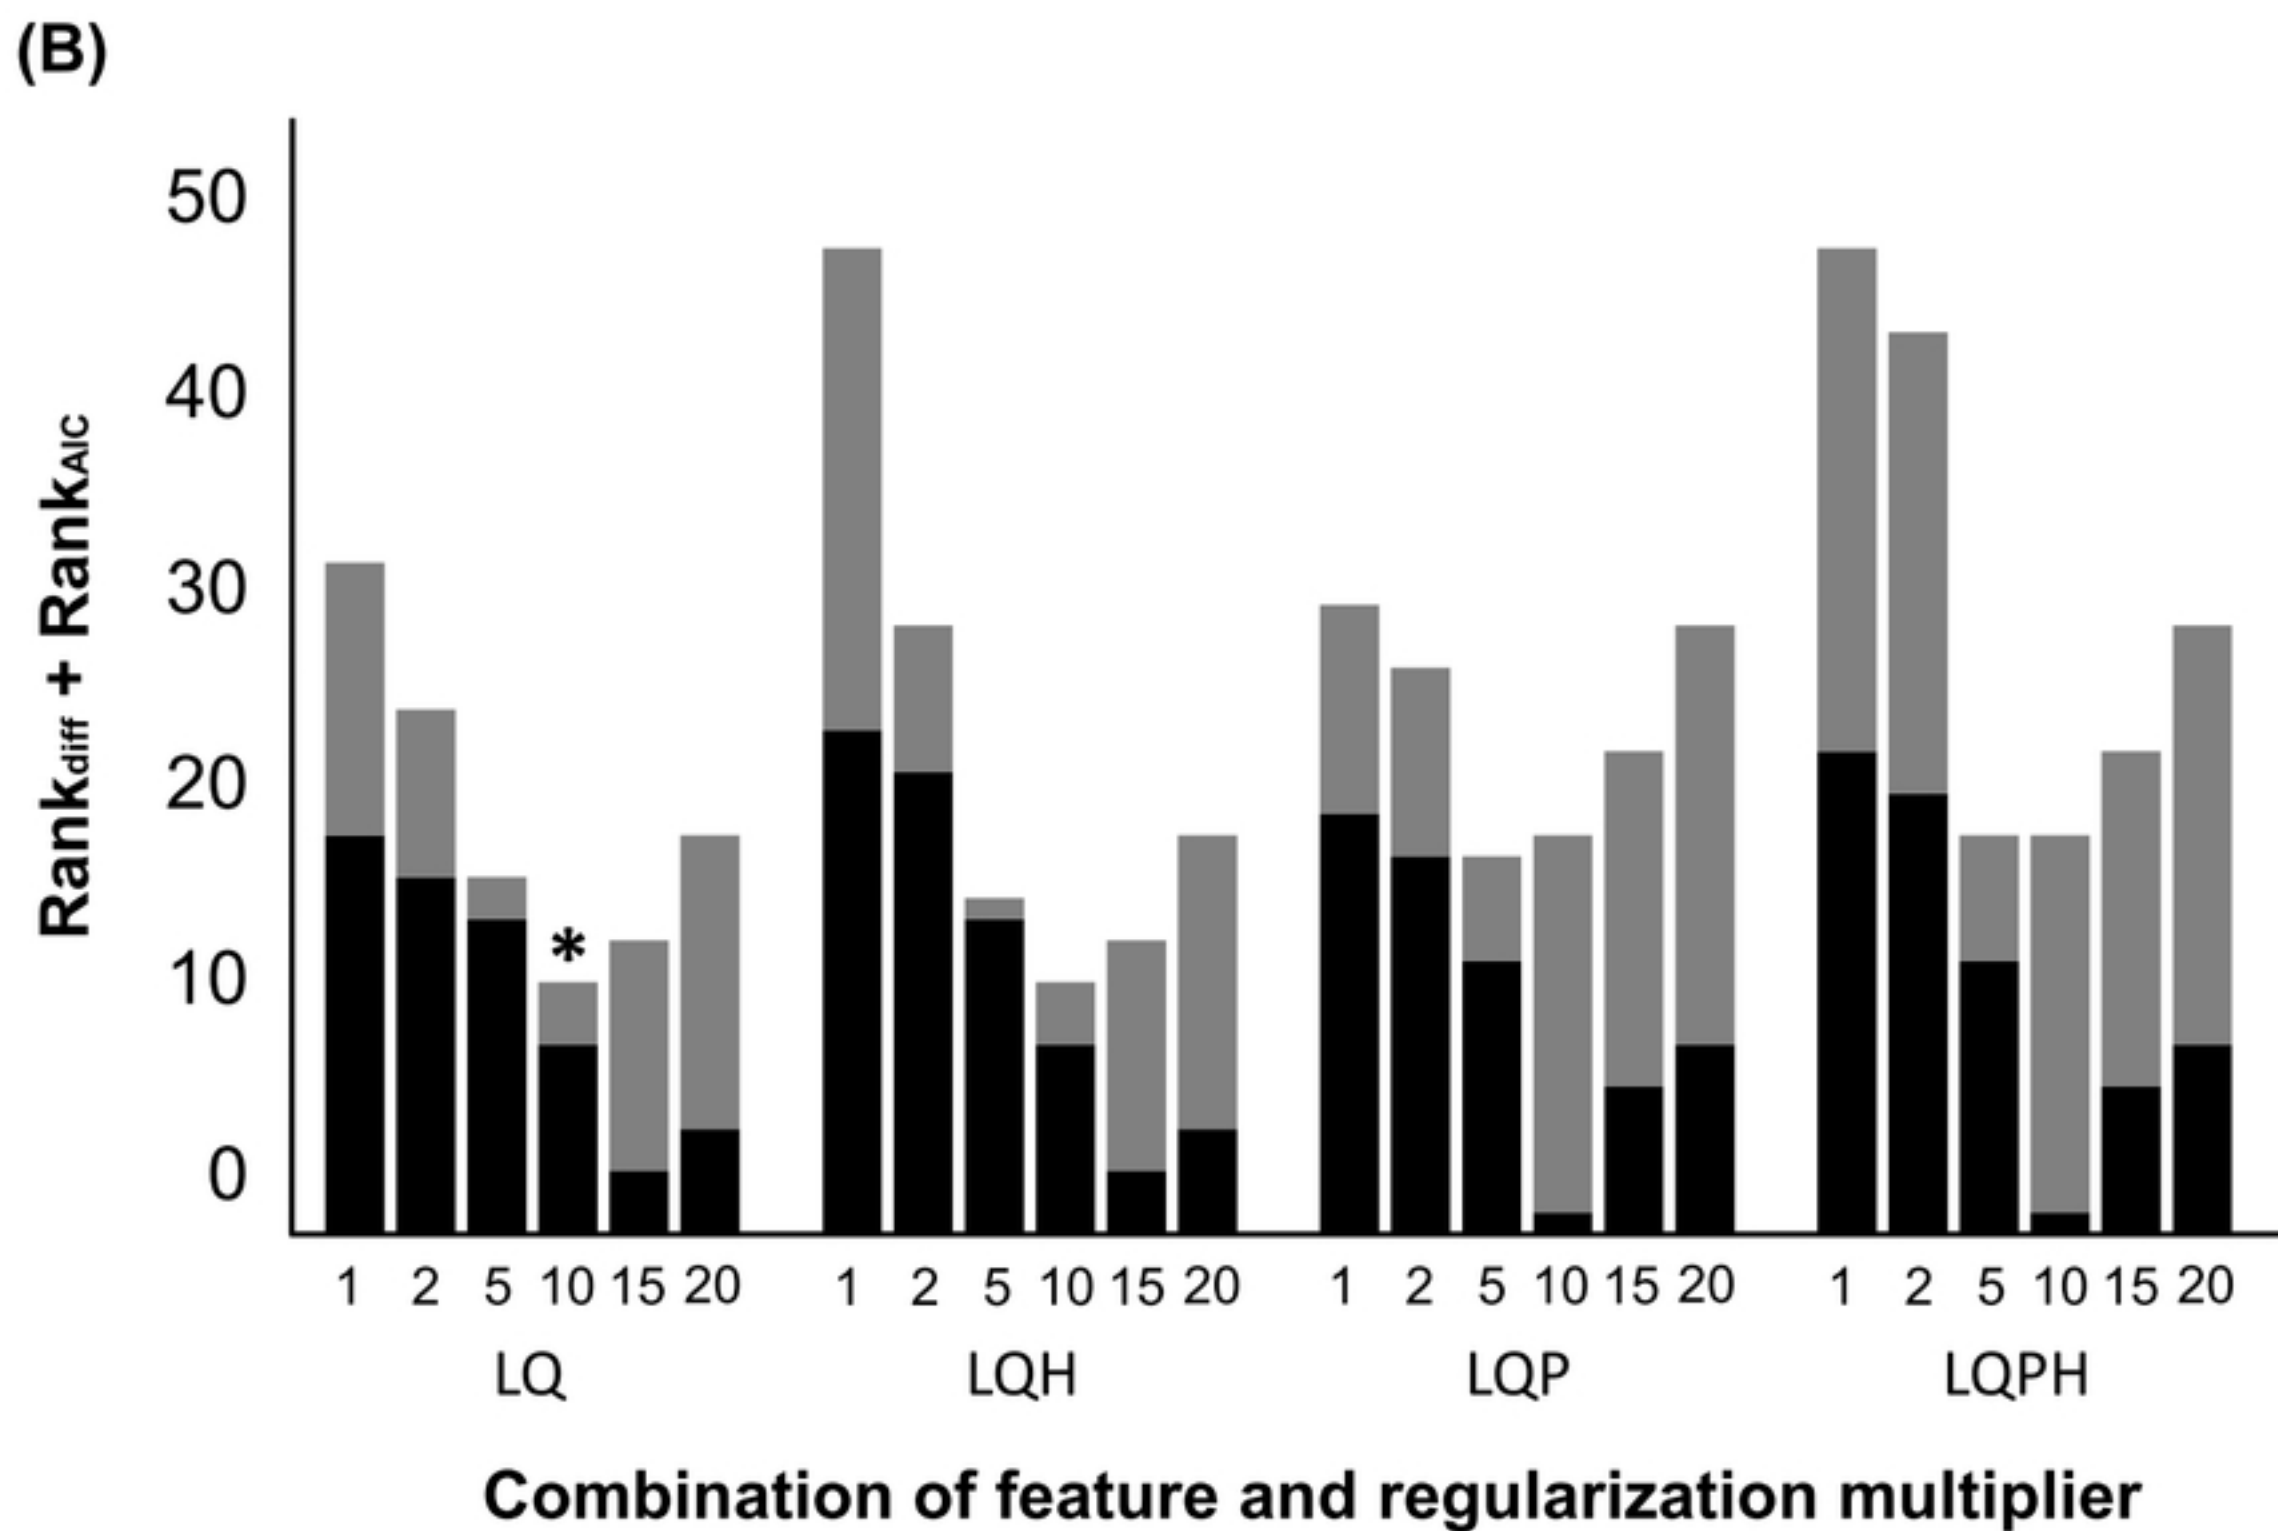

Figure 1

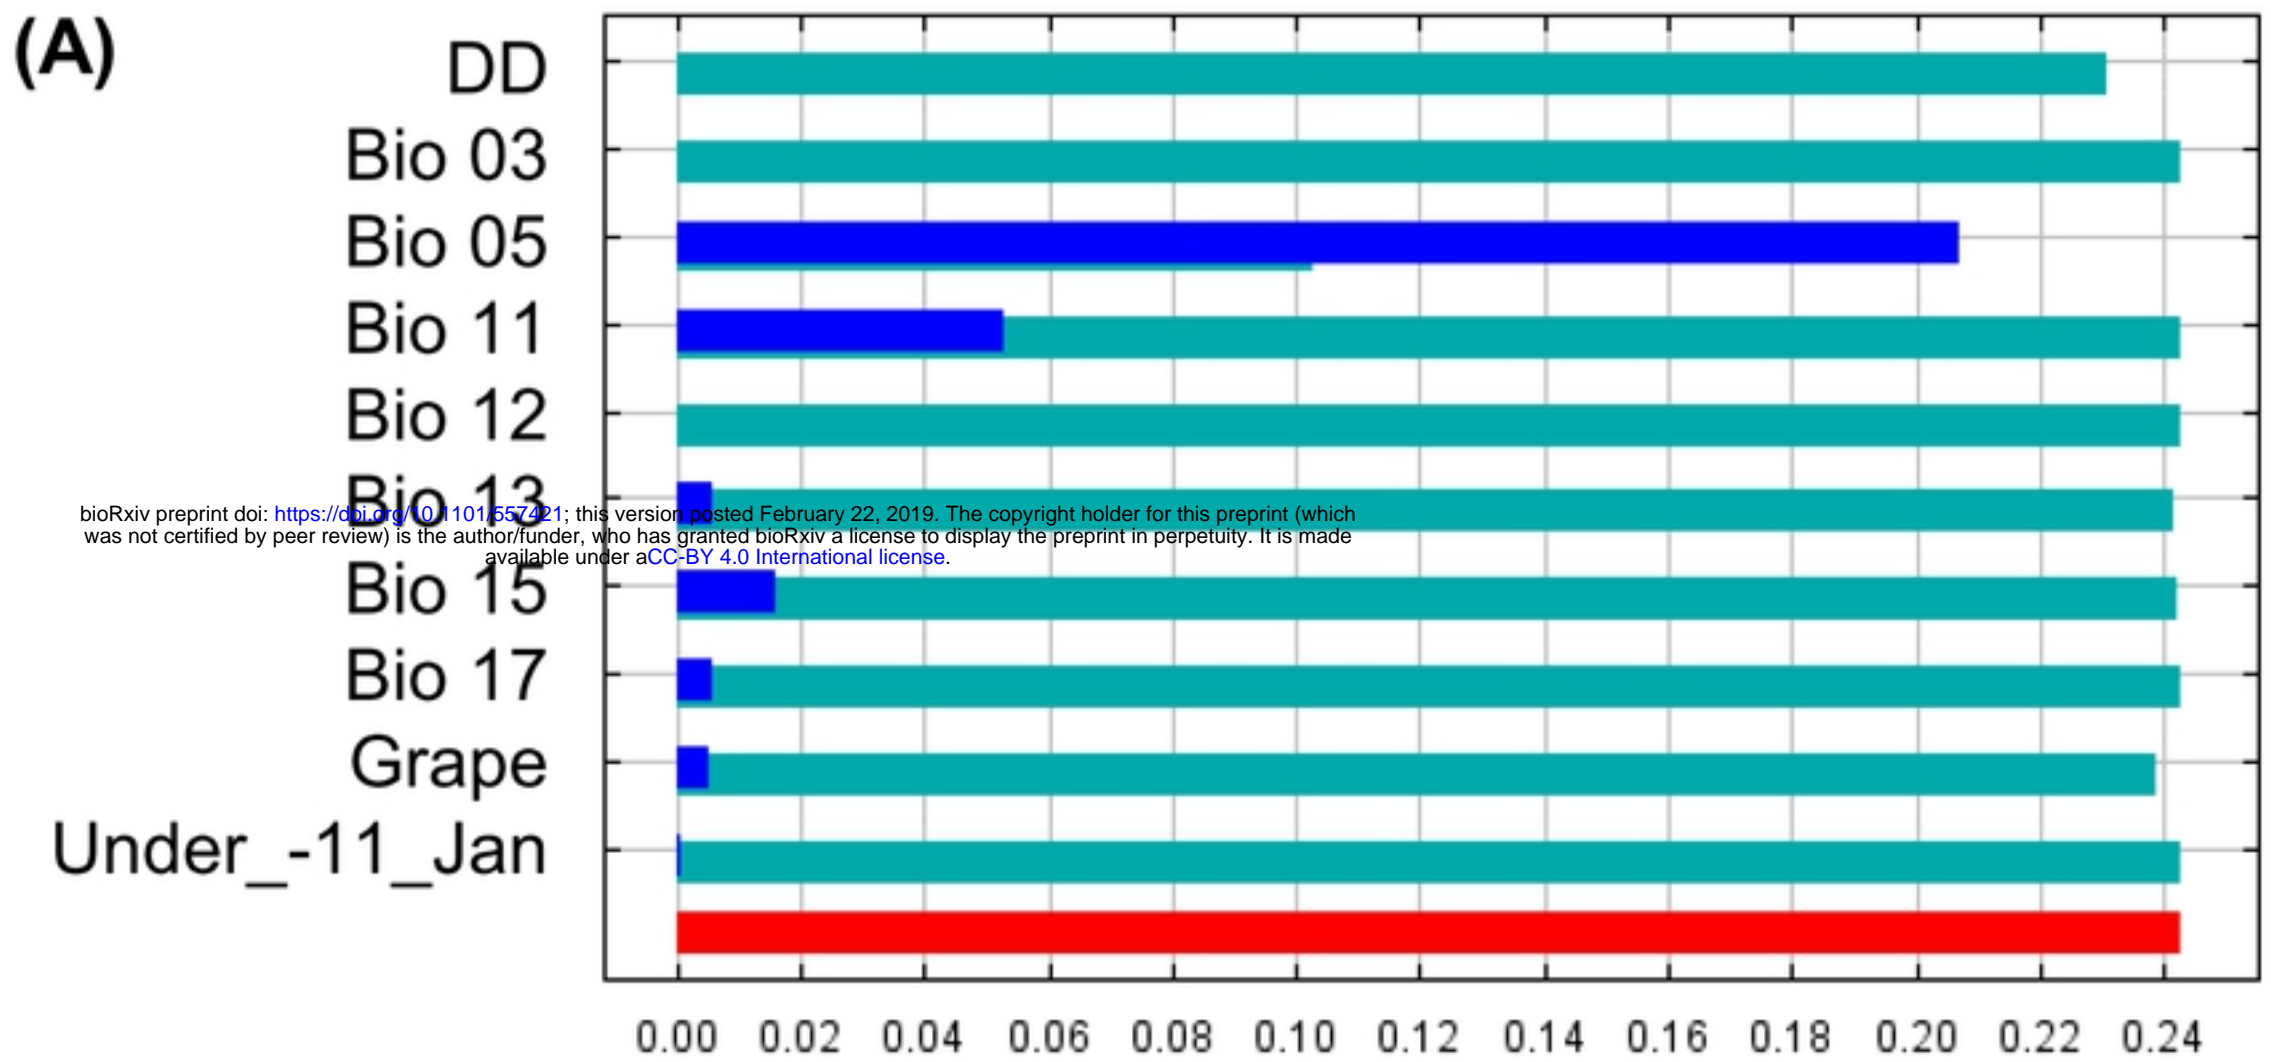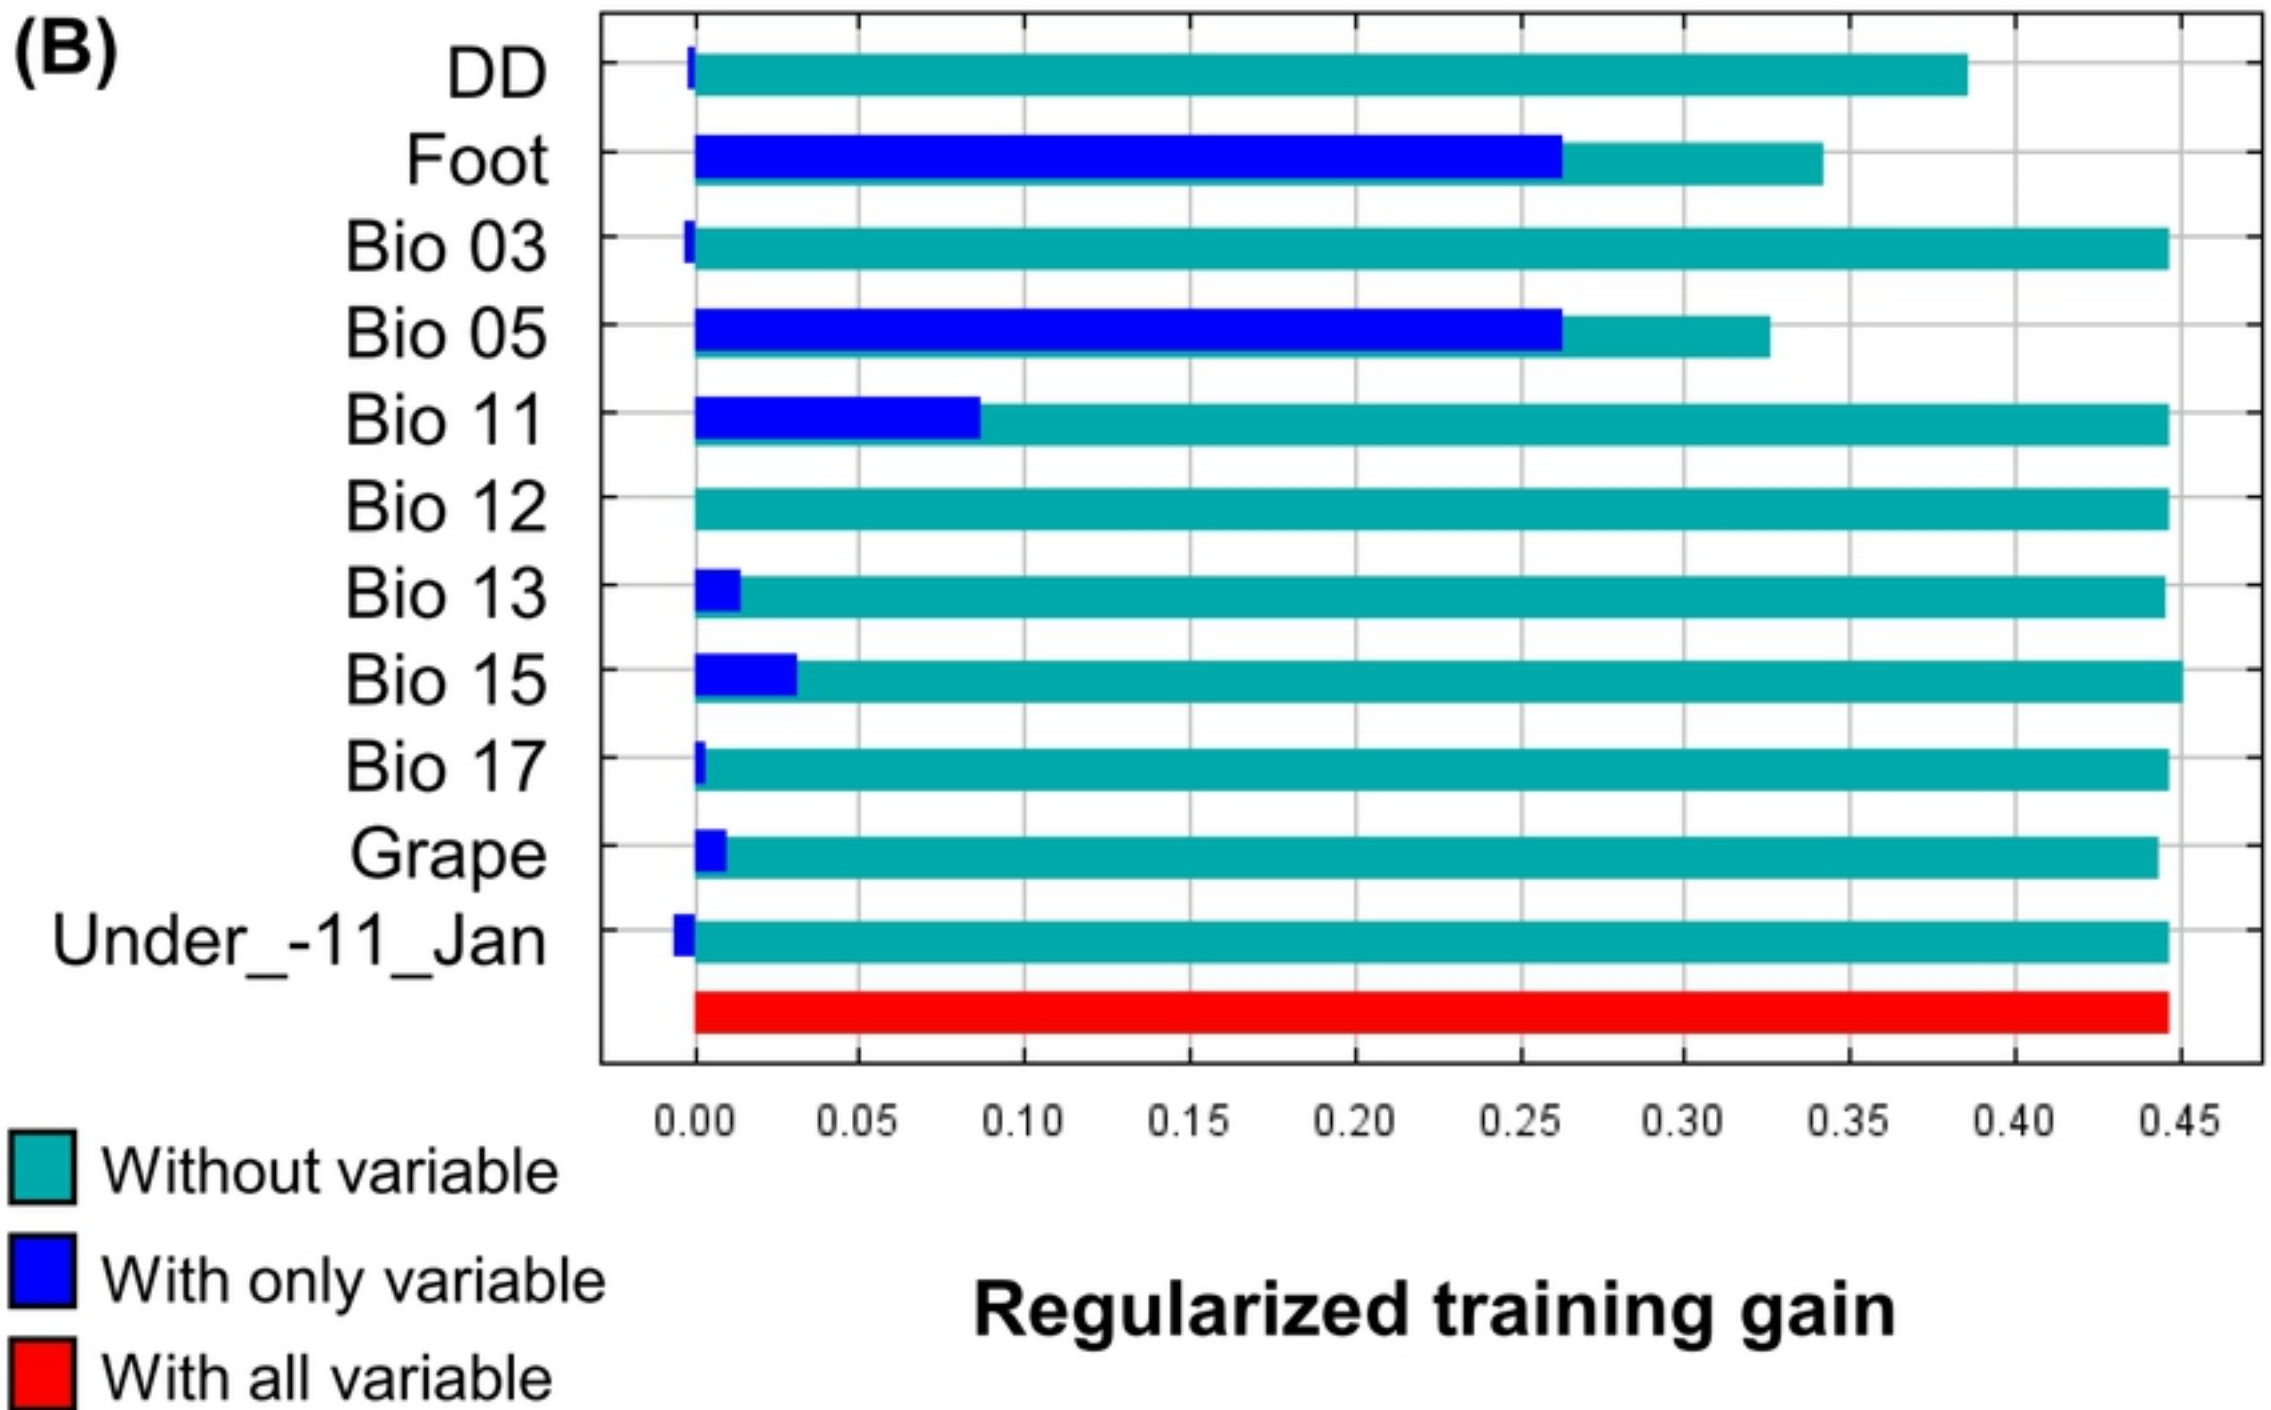

Figure 2

Probability of presence (logistic output)

bioRxiv preprint doi: <https://doi.org/10.1101/557421>; this version posted February 22, 2019. The copyright holder for this preprint (which was not certified by peer review) is the author/funder, who has granted bioRxiv a license to display the preprint in perpetuity. It is made available under aCC-BY 4.0 International license.

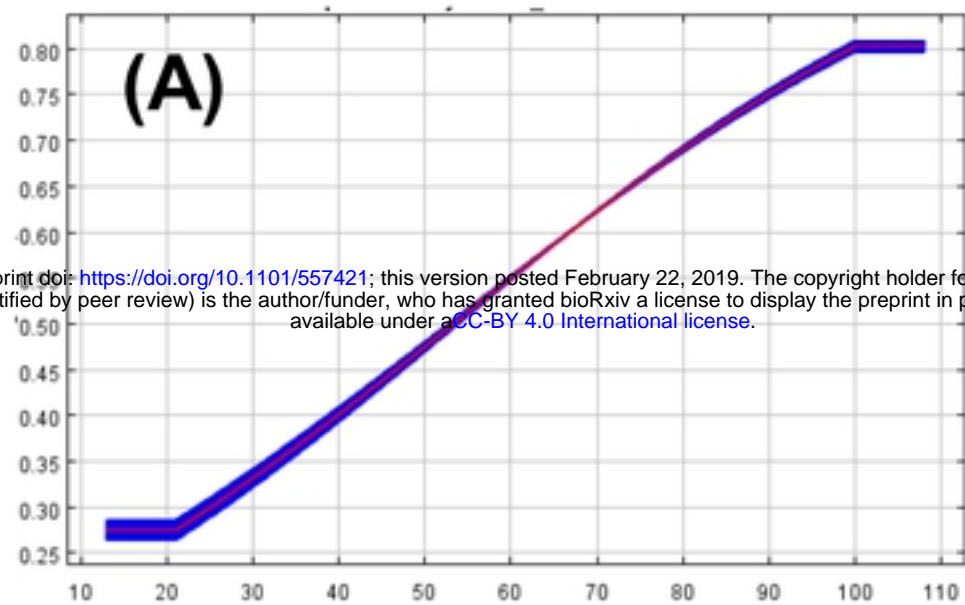

Footprint

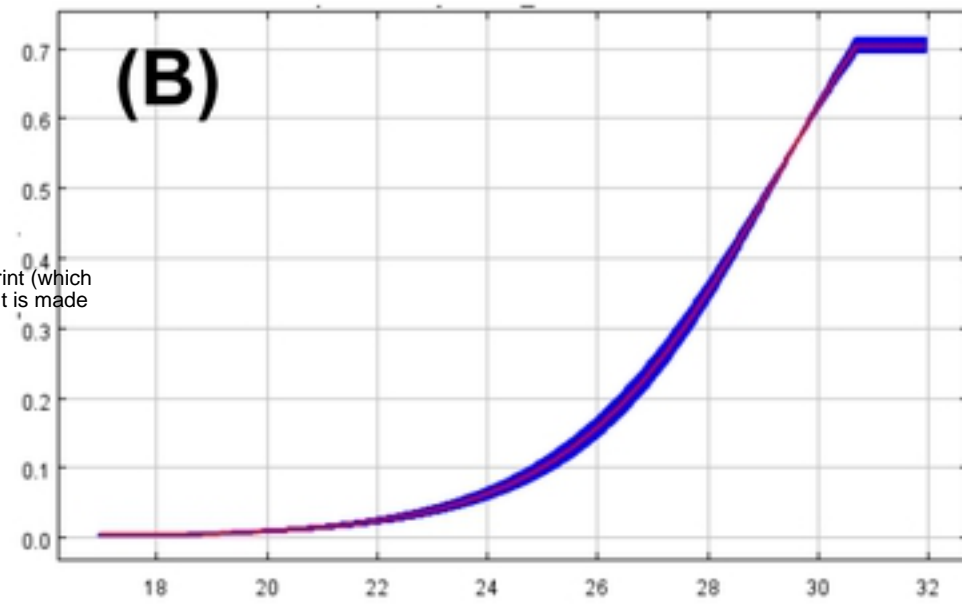

Bio 05

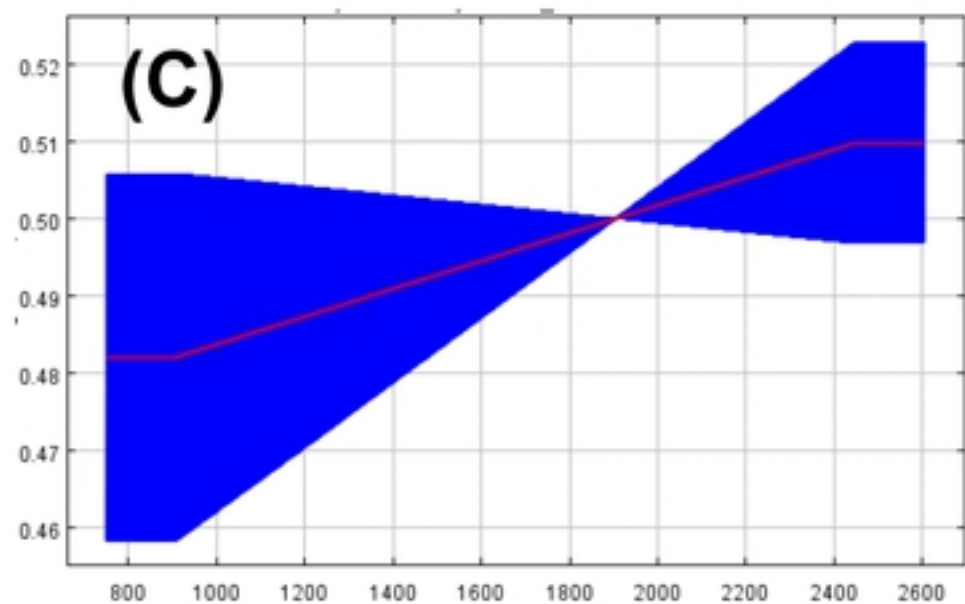

Degree day

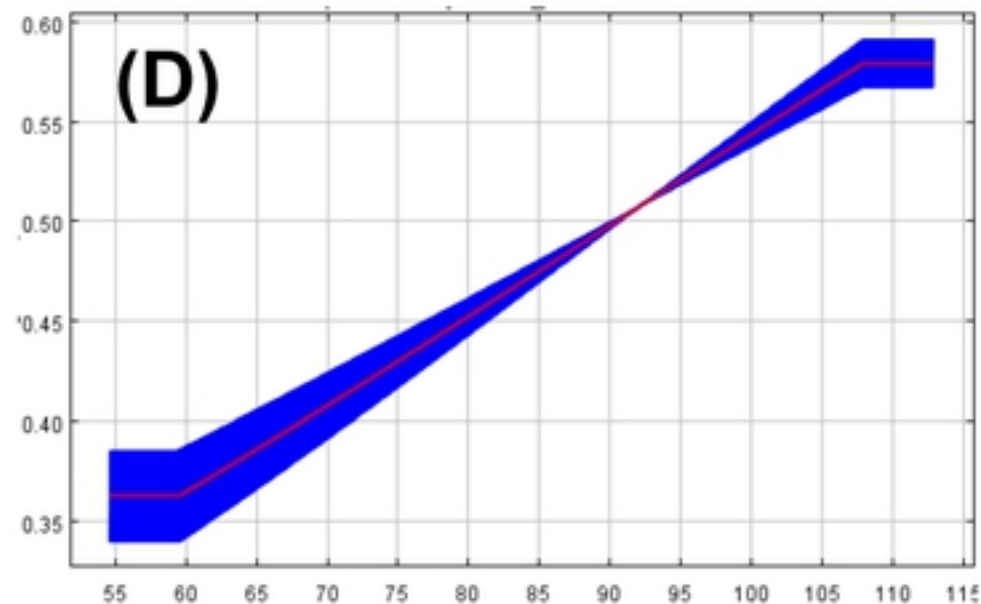

Bio 15

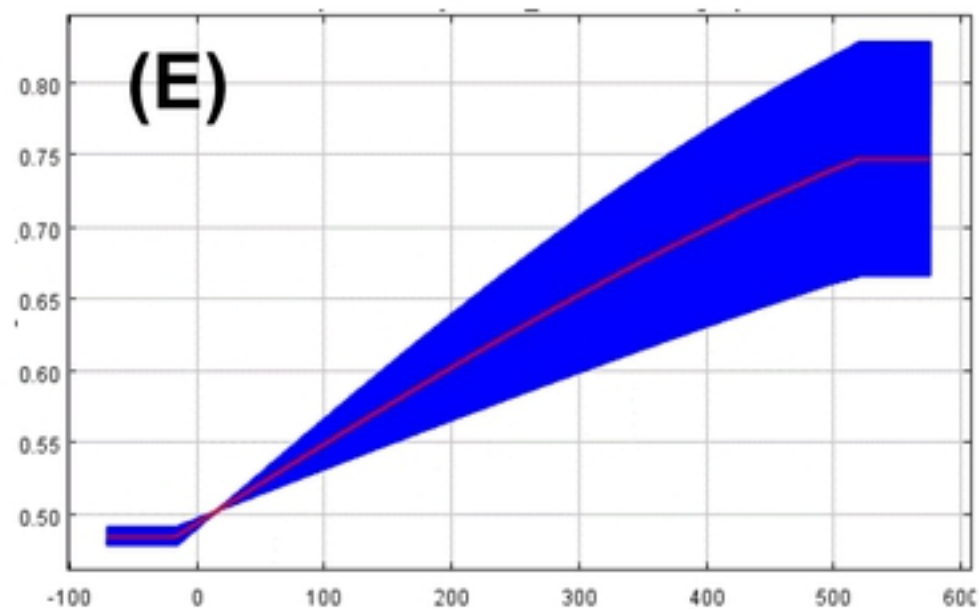

Grape

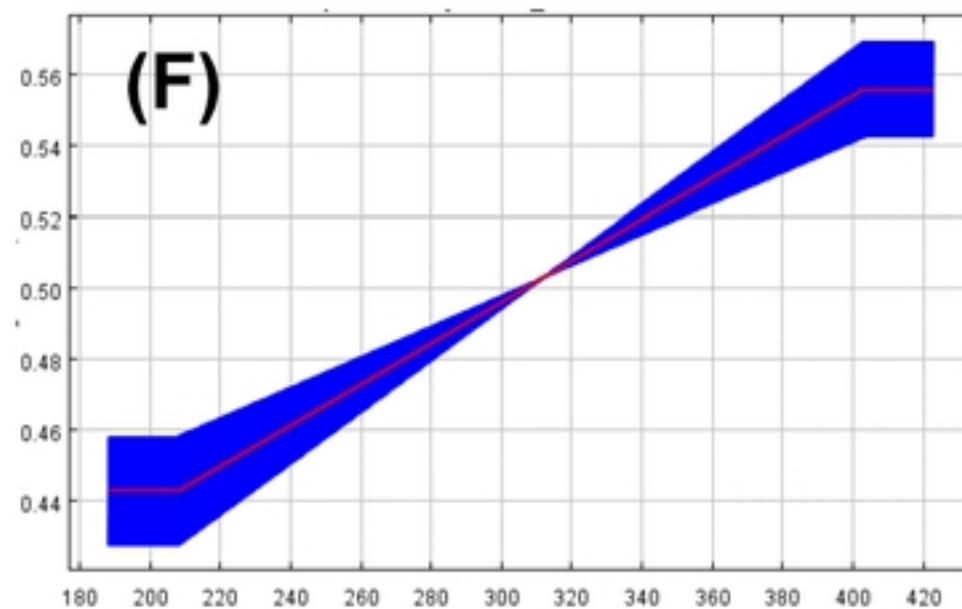

Bio 13

Figure 3



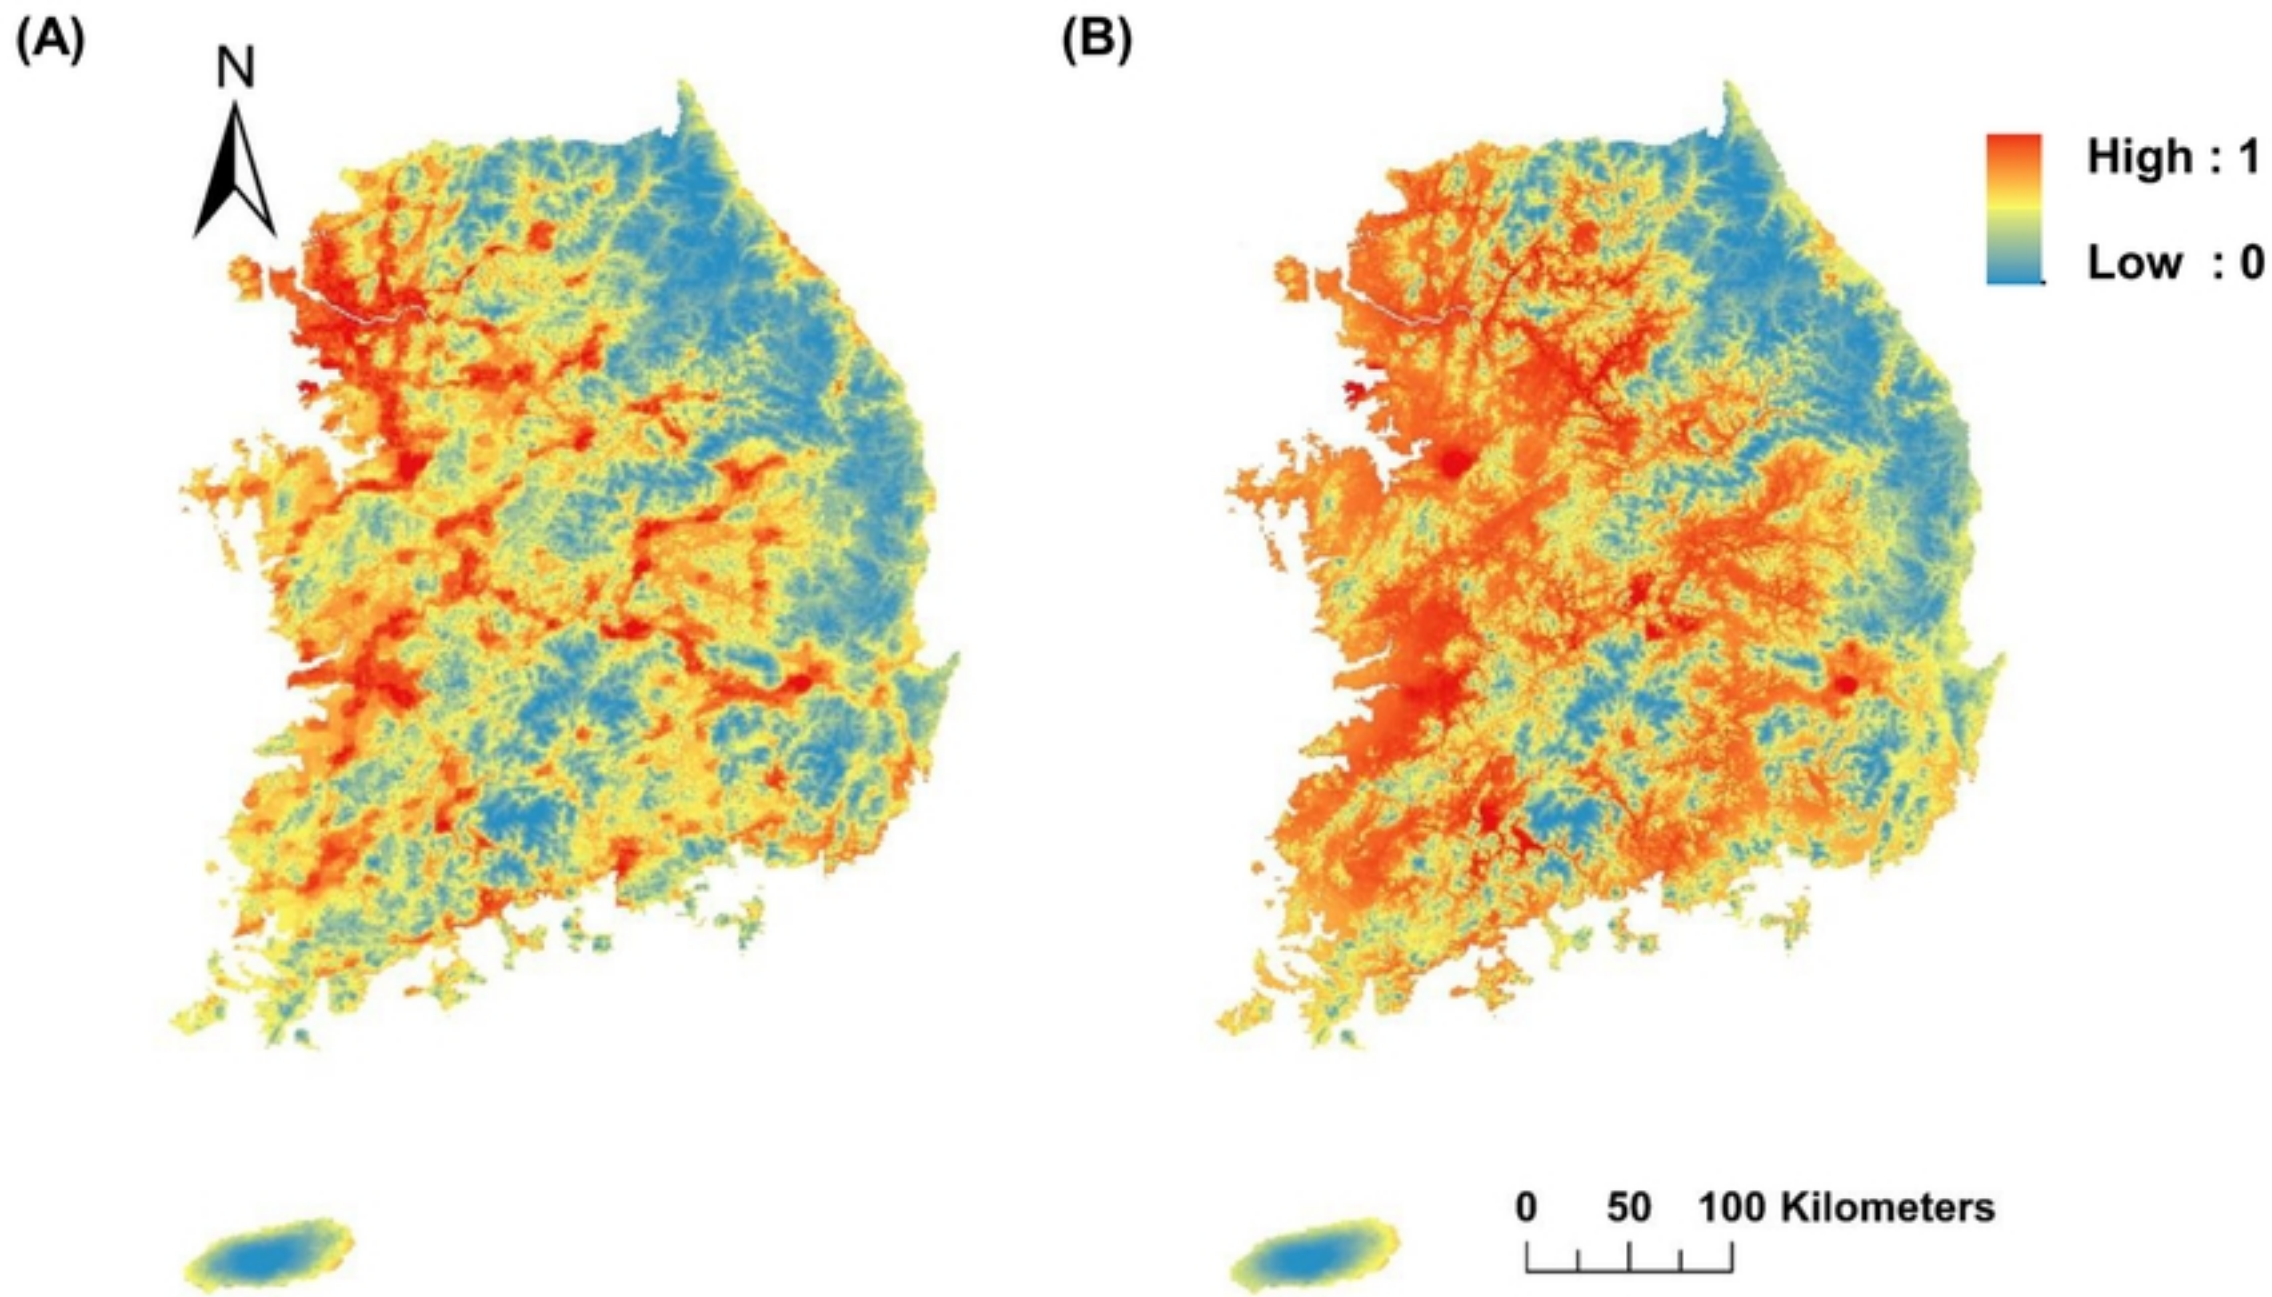

Figure 4
